# Supplementary material
Source: PubMed Central journal article supplement (PMC7097145)
Supplement: 41564_2016_BFnmicrobiol201658_MOESM452_ESM.pdf [file 41564_2016_BFnmicrobiol201658_MOESM452_ESM.pdf]

**Selection of antigenically advanced variants of seasonal influenza viruses**

Chengjun Li<sup>1\*</sup>, Masato Hatta<sup>1\*</sup>, David F. Burke<sup>2,3\*</sup>, Jihui Ping<sup>1\*</sup>, Ying Zhang<sup>1\*</sup>, Makoto Ozawa<sup>1,4</sup>, Andrew S. Taft<sup>1</sup>, Subash C. Das<sup>1</sup>, Anthony P. Hanson<sup>1</sup>, Jiasheng Song<sup>1</sup>, Masaki Imai<sup>1,5</sup>, Peter R. Wilker<sup>1</sup>, Tokiko Watanabe<sup>6</sup>, Shinji Watanabe<sup>6</sup>, Mutsumi Ito<sup>7</sup>, Kiyoko Iwatsuki-Horimoto<sup>7</sup>, Colin A. Russell<sup>3,8,9</sup>, Sarah L. James<sup>2,3</sup>, Eugene Skepner<sup>2,3</sup>, Eileen A. Maher<sup>1</sup>, Gabriele Neumann<sup>1</sup>, Alexander I. Klimov<sup>10†</sup>, Anne Kelso<sup>11</sup>, John McCauley<sup>12</sup>, Dayan Wang<sup>13</sup>, Yuelong Shu<sup>13</sup>, Takato Odagiri<sup>14</sup>, Masato Tashiro<sup>14</sup>, Xiyang Xu<sup>10</sup>, David E. Wentworth<sup>10</sup>, Jacqueline M. Katz<sup>10</sup>, Nancy J. Cox<sup>10</sup>, Derek J. Smith<sup>2,3,15</sup>, and Yoshihiro Kawaoka<sup>1,4,6,7</sup>

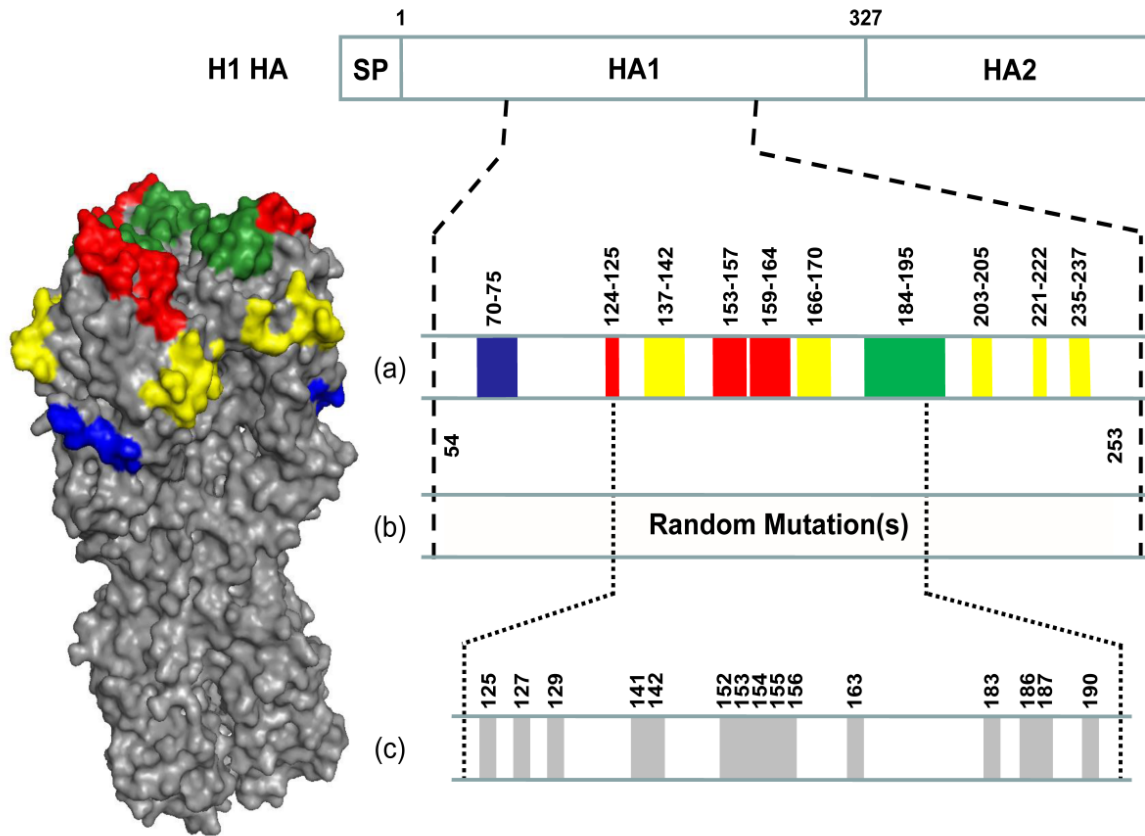

**Supplementary Figure 1 | Schematic diagram of pandemic (H1N1) 2009 influenza A viral haemagglutinin (HA).** A schematic diagram of the HA gene with the coding regions of the HA1 and HA2 subunits is shown on top; SP indicates the signal peptide sequence. The three dimensional structure of A/California/04/2009 HA (PDBID: 3LZG)<sup>1</sup> is shown on the left. The antigenic epitopes (also shown in (a)) are indicated as follows: Sa site, red; Sb site, green; Ca site, yellow; Cb site, blue. The region targeted for random mutagenesis is shown in (b), and specific sites targeted for mutagenesis are shown in (c).

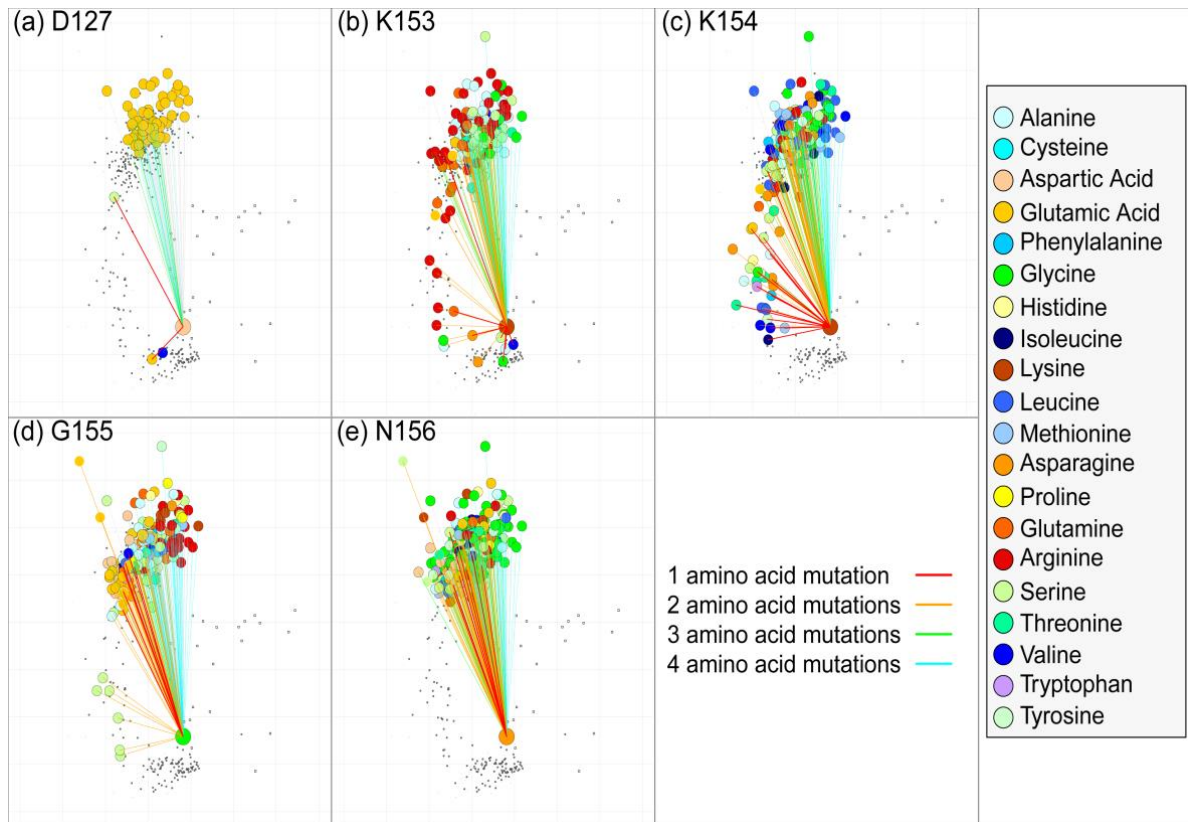

**Supplementary Figure 2 | Color-coded antigenic maps for mutations at positions where large antigenic changes were detected.** Large antigenic changes were detected for amino acid mutations at HA positions 127, 153, 154, 155, and 156. Here we show antigenic map where viruses containing amino acid mutations at each of these positions are shown as larger circles. The color of the circle indicates the amino acid of the mutant virus at that position. The lines connecting the mutant strain to wild-type A/Norway/3858/2009 virus are colored according to the total number of amino acid mutations (red=1, orange=2, green=3, cyan=4) between the two strains.

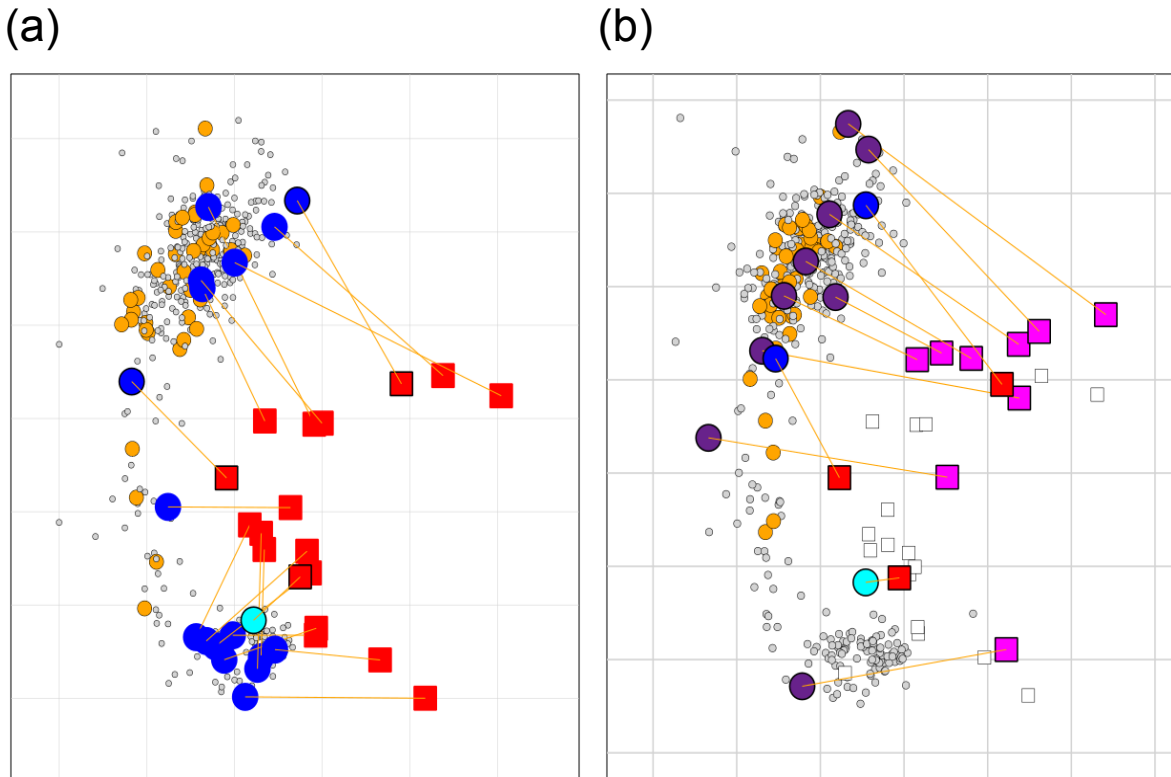

**Supplementary Figure 3 | Antigenic maps comparing the initial and additional sets of antisera.** Shown in (a) are the positions of the initial set of antisera (red boxes) with lines connecting their homologous antigens (blue circles = mutant viruses; cyan circle = A/Norway/3858/2009). The positions of the viruses selected for further testing with new antisera (approximately 13% of the total number of mutant viruses) are shown as orange circles. These viruses were selected based upon their original position in the map as well as the biophysical properties of the amino acids at positions 153-156. Shown in (b) an antigenic map based on data with nine additional ferret antisera (pink squares) raised against nine mutant viruses (purple circles). HI titres were determined for selected viruses (represented by orange, purple, blue and cyan circles) against these new antisera together with three antisera (red squares) shown in panel 3a that were used to generate the original antigenic map. The faint antisera squares in panel 3b represent the original sera that were not retested in this experiment. The map in 3b was generated by analyzing the HI of the viruses (depicted by orange, purple, blue and cyan circles) tested with the nine new (pink squares) plus three original (red squares) antisera, along with the original HI data used to make the map in 3a. In both panels, the remaining antigenic escape variants examined in this study are shown as small grey circles. No significant changes in the positions of viruses or antisera were seen between the two maps.

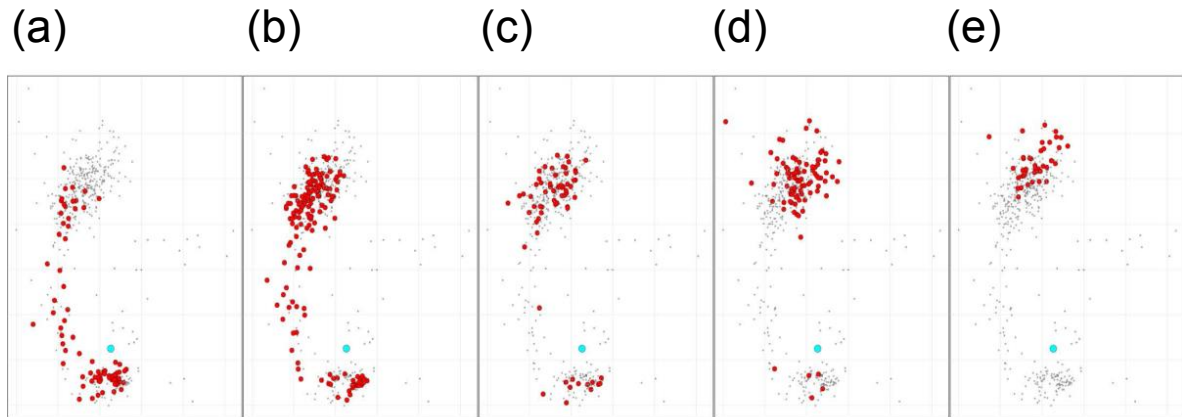

**Supplementary Figure 4 | Positions of strains by numbers of amino acid mutations.** In each panel, mutant viruses (red circles) possessing a given number of amino acid mutations (**a** = one, **b** = two, **c** = three, **d** = four, or **e** = five mutations) are shown on an antigenic map in comparison to wild-type A/Norway/3858/2009 virus (cyan circle).

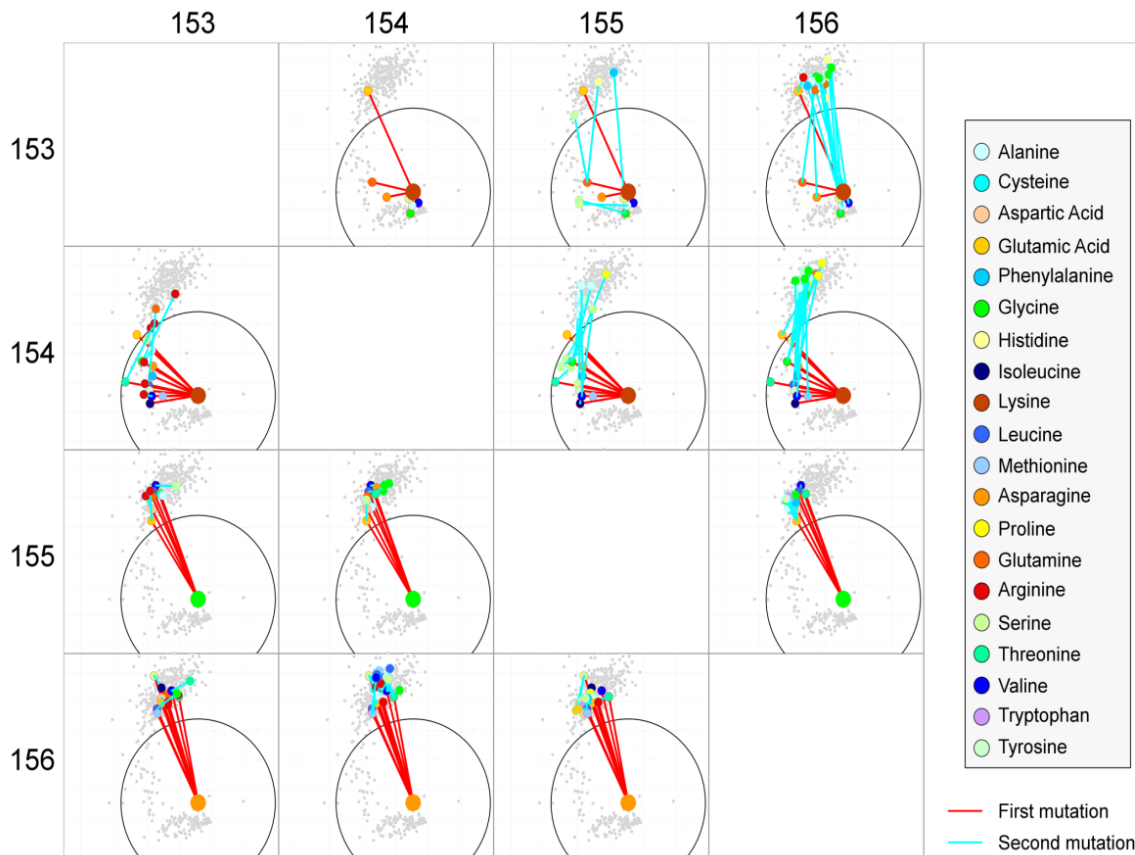

**Supplementary Figure 5 | Antigenic maps showing the effects of double amino acid mutations at positions shown to cause a large antigenic change (i.e., positions 153, 154, 155, and 156).** In each row, red lines connect the wild-type A/Norway/3858/2009 strain to viruses with a single amino acid mutation at the particular position (labels on left). Cyan lines connect those mutants which have an additional amino acid mutation in a second position (labels on top of each column). The color of the circle indicates the amino acid (see key in figure). Circles indicate a distance of 4 HI units from the reference virus; i.e., mutants outside the circle would necessitate a vaccine update.

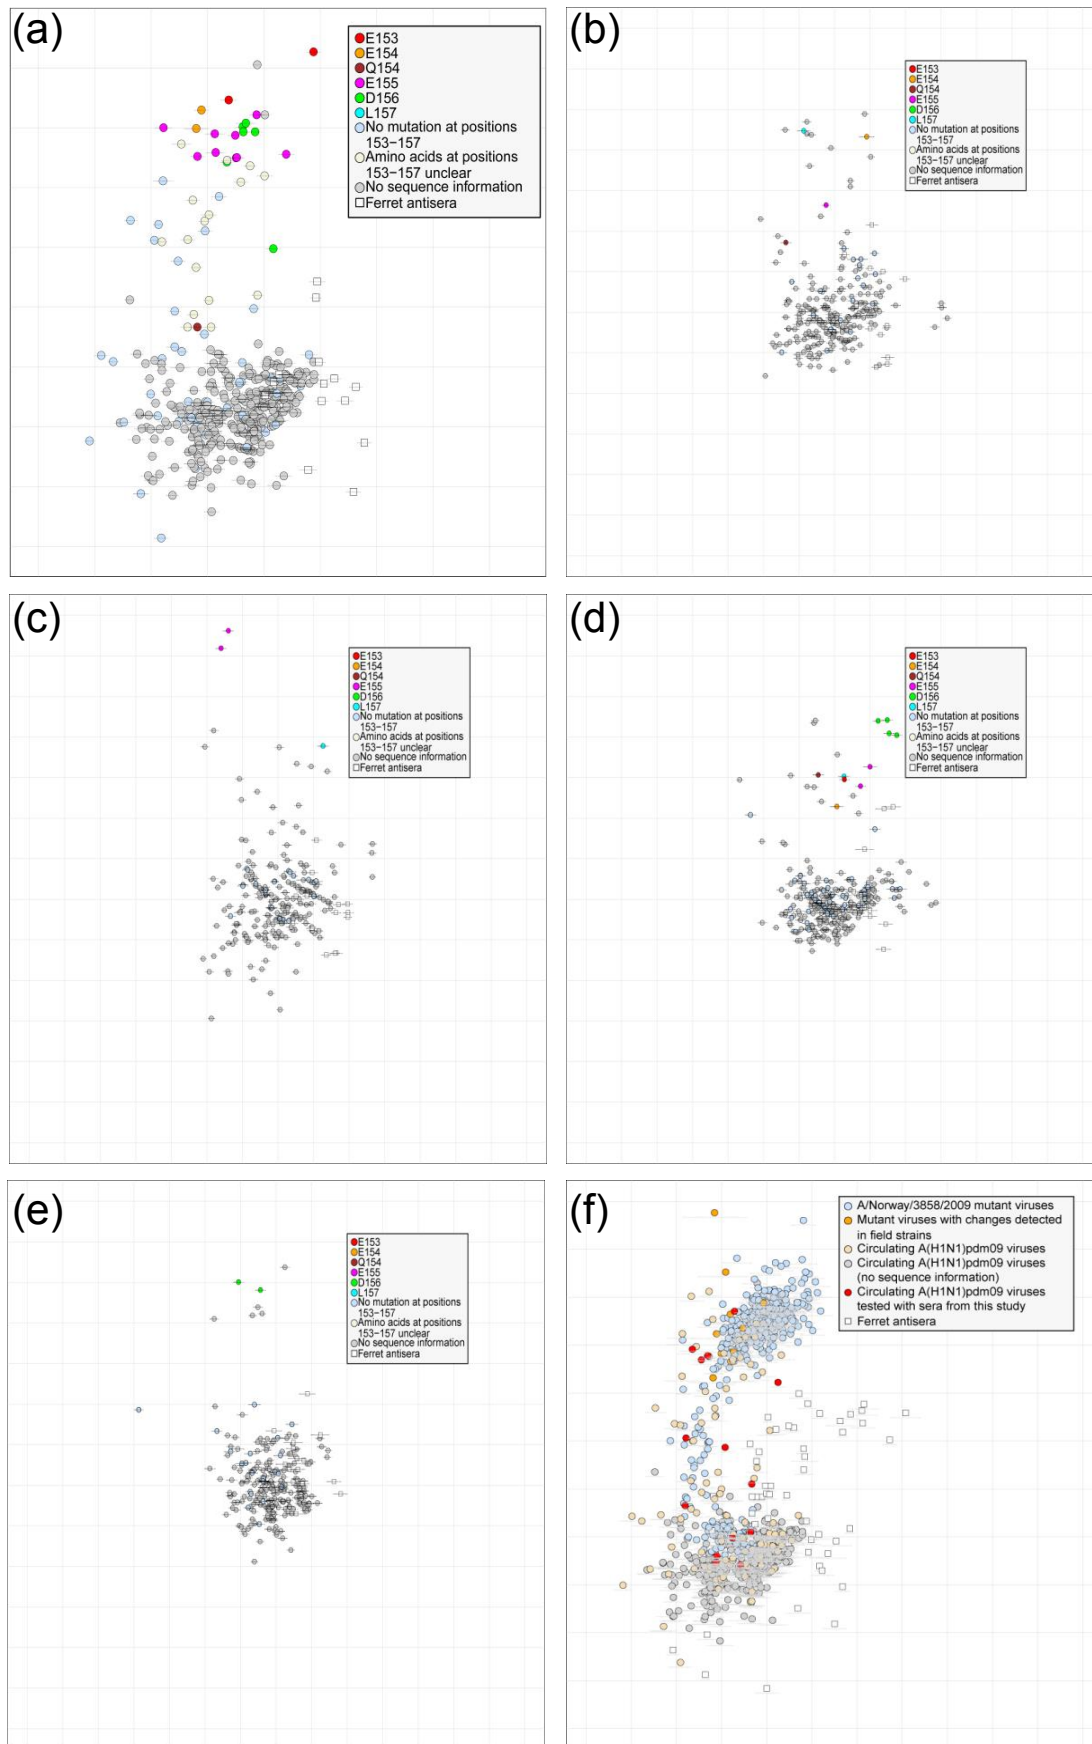

**Supplementary Figure 6 | Antigenic maps from WHO Collaborating Centre data from 2009 – 2013.** (a) Zoomable and searchable labeled antigenic map of 862 A(H1N1)pdm09 circulating strains from WHO surveillance in 2009 and 2010 (pale blue circles). Where an amino acid sequence is available, viruses with mutations at positions 153-157 are coloured by amino acid type; viruses for which the HA sequence has not been determined are shown as light grey circles. For some viruses, the identity of one or more amino acids at positions 153-157 was unclear in sequence data (pale yellow circles). (b) – (e) Zoomable and searchable labeled antigenic maps of 415, 345, 424, and 512 A(H1N1)pdm09 viruses isolated from December 2010 – March 2011 (b), October 2011 – March 2012 (c), November 2012 – March 2013 (d) and October 2013 – December 2013 (e). Where an amino acid sequence is available, viruses with mutations at positions 153–157 are coloured by amino acid type; viruses for which the HA sequence has not been determined are shown as light grey circles. (f) Zoomable and searchable labeled antigenic map of merged datasets includes A(H1N1)pdm09 viruses from the mutant screens in this study (light blue circles); A(H1N1)pdm09-based reassortant viruses with changes detected in field strains (orange circles); and circulating viruses from WHO surveillance studies with HA sequence data (pale orange circles) or without HA sequence data (light grey circles). Circulating A(H1N1)pdm09 viruses tested with a subset of sera from this study are shown as red circles.



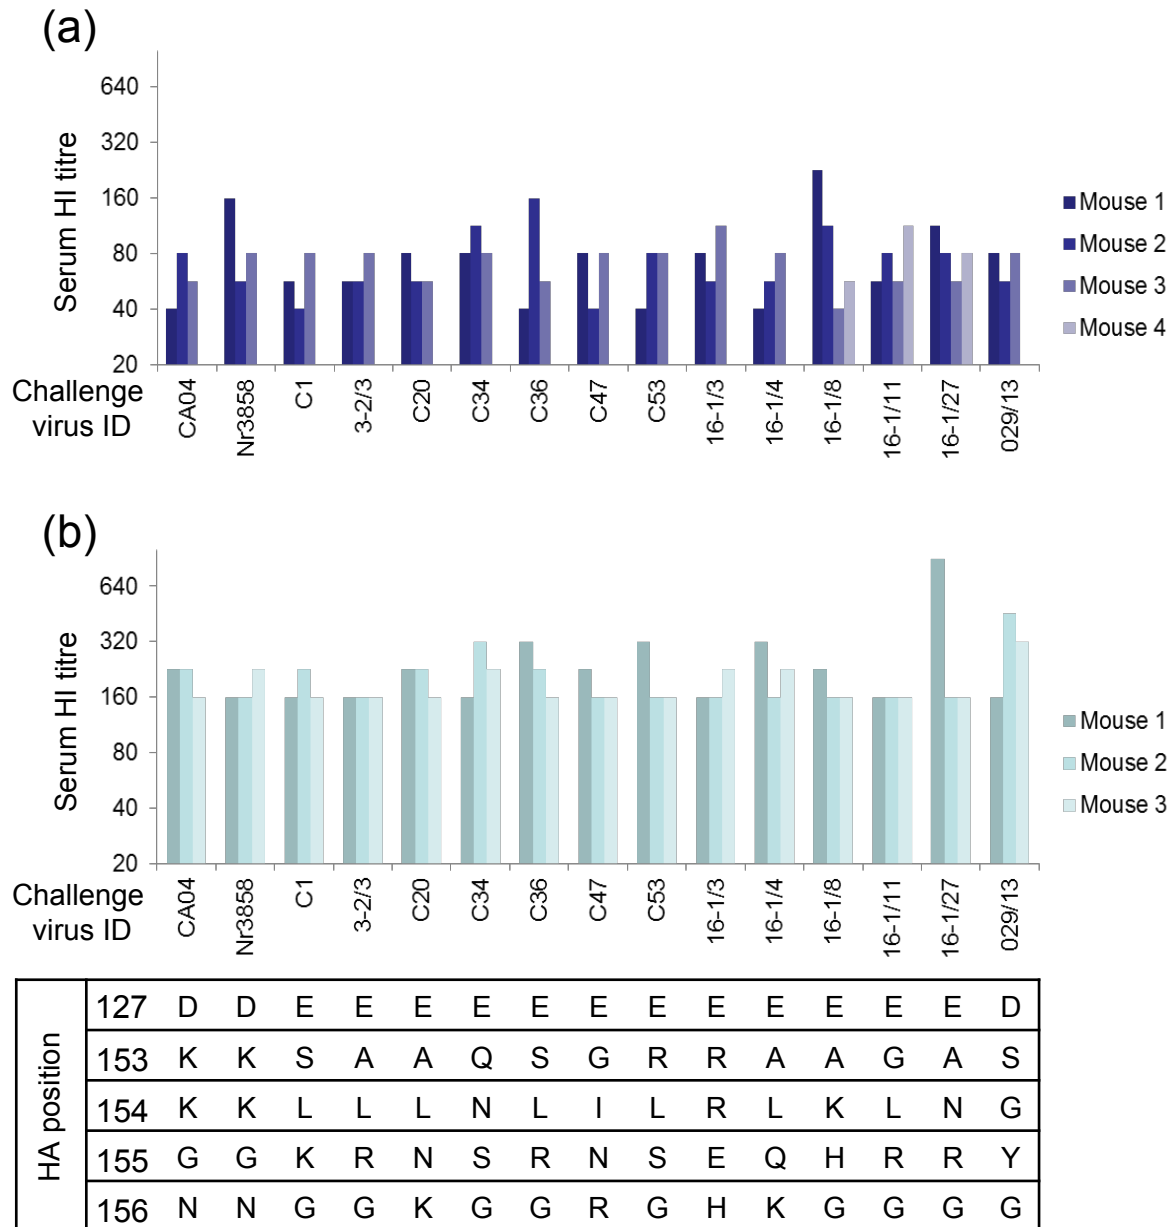

**Supplementary Figure 7 | Serum HI titres of immunized mice subsequently challenged with selected escape variants.** Three or four mice per group were immunized by intranasal infection with  $10^{1.5}$  PFU of A/California/04/2009 virus (a) or by vaccinating twice (with a two-week interval) with an A/California/07/2009 HA split vaccine (b). Four weeks later, serum HI titres were determined using standard HI assays with 0.5% turkey red blood cells and the amount of A/California/04/2009 virus equivalent to 8 haemagglutination units. For better data comparison, we list on the X-axis the viruses with which the respective groups of mice were subsequently challenged (for results of the challenge experiment, see Supplementary Fig. 9).

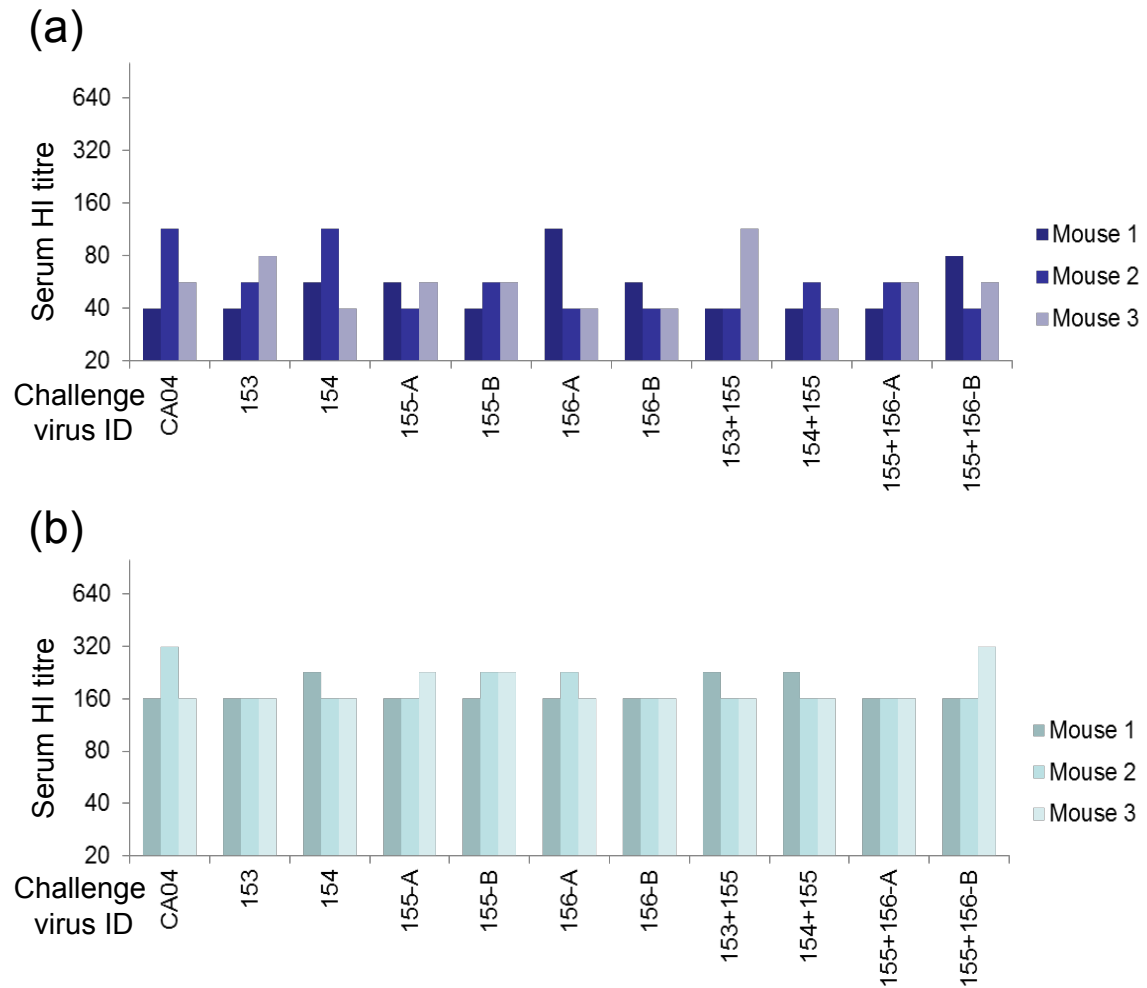

|             |     |   |   |   |   |   |   |   |   |   |   |   |
|-------------|-----|---|---|---|---|---|---|---|---|---|---|---|
| HA position | 153 | K | E | K | K | K | K | K | E | K | K | K |
|             | 154 | K | K | E | K | K | K | K | K | Q | K | K |
|             | 155 | G | G | G | E | E | G | G | E | E | E | E |
|             | 156 | N | N | N | N | N | S | T | N | N | S | K |

**Supplementary Figure 8 | Serum HI titres of immunized mice subsequently challenged with A(H1N1)pdm09-based reassortant viruses possessing HA changes detected in field strains.** Three mice per group were immunized by intranasal infection with  $10^{1.5}$  PFU of A/California/04/2009 (a) or by vaccinating twice (with a two-week interval) with an A/California/07/2009 HA split vaccine (b). Four weeks later, serum HI titres were determined using standard HI assays with 0.5% turkey red blood cells and the amount of A/California/04/2009 virus equivalent to 8 haemagglutination units. For better data comparison, we list on the X-axis the viruses with which the respective groups of mice were subsequently challenged (for results of the challenge experiment, see Supplementary Fig. 10).

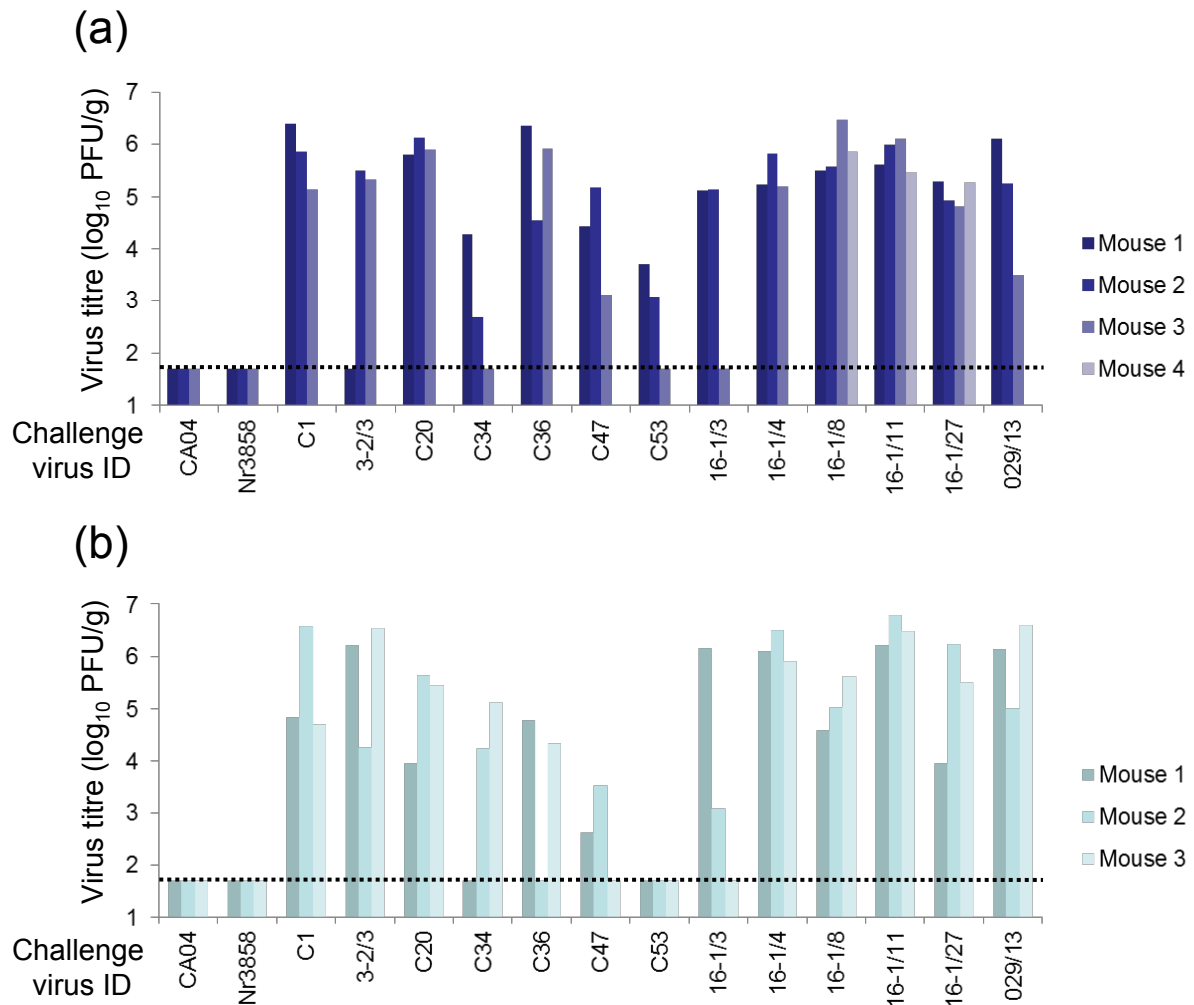

|             |     |   |   |   |   |   |   |   |   |   |   |   |   |   |   |   |
|-------------|-----|---|---|---|---|---|---|---|---|---|---|---|---|---|---|---|
| HA position | 127 | D | D | E | E | E | E | E | E | E | E | E | E | E | D |   |
|             | 153 | K | K | S | A | A | Q | S | G | R | R | A | A | G | A | S |
|             | 154 | K | K | L | L | L | N | L | I | L | R | L | K | L | N | G |
|             | 155 | G | G | K | R | N | S | R | N | S | E | Q | H | R | R | Y |
|             | 156 | N | N | G | G | K | G | G | R | G | H | K | G | G | G | G |

**Supplementary Figure 9 | Immune evasion in mice by HA mutant viruses identified in this study.** Three or four mice per group were immunized by intranasal infection with  $10^{1.5}$  PFU of A/California/04/2009 (a), or by vaccination with an A/California/07/2009 HA split vaccine (b). Four weeks later, serum HI titres against A/California/04/2009 were determined (Supplementary Fig. 7) and mice were challenged with  $10^6$  PFU of A/California/04/2009, A/Norway/3858/2009, or the representative antigenic escape mutants shown on the X-axis (see also Supplementary Table 18). Shown are lung virus titers on day 4 post-challenge. Dashed lines, detection limit of virus ( $1.7 \log_{10}$  PFU/g).

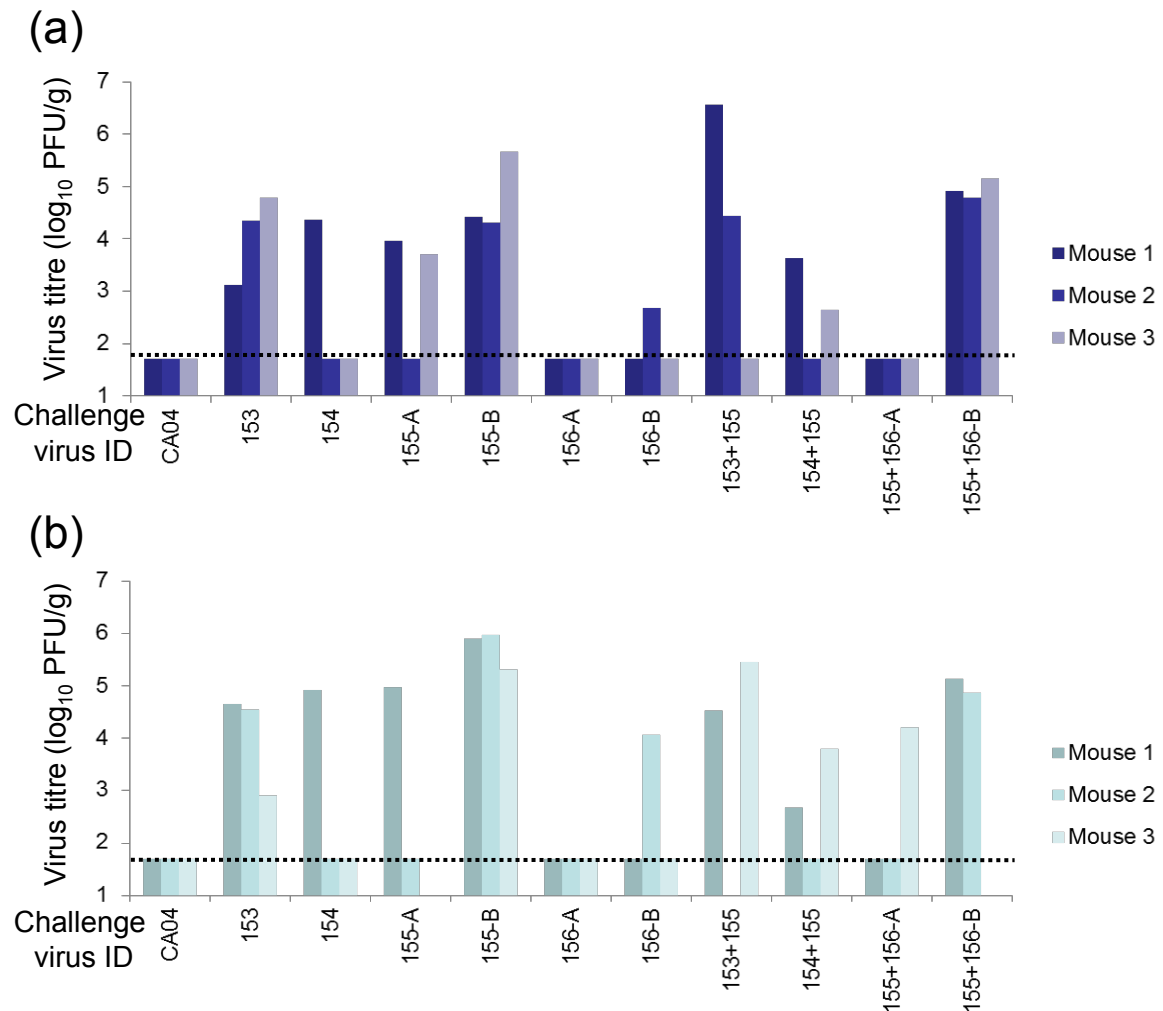

|             |     |   |   |   |   |   |   |   |   |   |   |   |
|-------------|-----|---|---|---|---|---|---|---|---|---|---|---|
| HA position | 153 | K | E | K | K | K | K | K | E | K | K | K |
|             | 154 | K | K | E | K | K | K | K | K | Q | K | K |
|             | 155 | G | G | G | E | E | G | G | E | E | E | E |
|             | 156 | N | N | N | N | N | S | T | N | N | S | K |

**Supplementary Figure 10 | Immune evasion in mice by HA mutations found in field strains.** Three mice per group were immunized by intranasal infection with  $10^{1.5}$  PFU of A/California/04/2009 (a), or by vaccination with an A/California/07/2009 HA split vaccine (b). Four weeks later, serum HI titres against A/California/04/2009 were determined (Supplementary Fig. 8) and mice were challenged with  $10^6$  PFU of A/California/04/2009 or with A/Norway/3568/2009-based reassortant viruses possessing changes in HA at positions 153-156 detected in field strains as shown on the X-axis (see also Supplementary Table 19). On day 4 post-challenge, virus titres in mouse lungs were determined. Dashed lines, detection limit of virus ( $1.7 \log_{10}$  PFU/g).

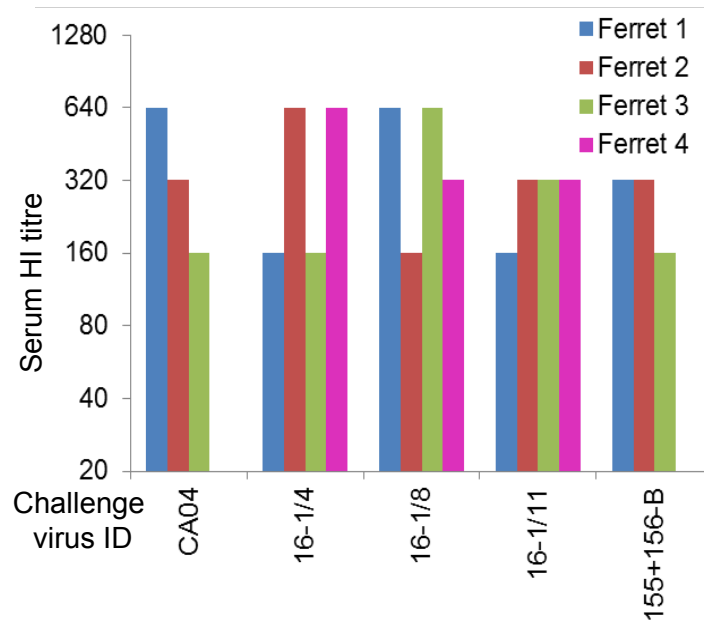

|             |     |   |   |   |   |   |
|-------------|-----|---|---|---|---|---|
| HA position | 127 | D | E | E | E | D |
|             | 153 | K | A | A | G | K |
|             | 154 | K | L | K | L | K |
|             | 155 | G | Q | H | R | E |
|             | 156 | N | K | G | G | K |

**Supplementary Figure 11 | Serum HI titres of immunized ferrets subsequently challenged with escape variants identified in this study or found in a field strain.** Three or four ferrets per group were infected by intranasal inoculation with 500 PFU of A/California/04/2009 virus. Twelve months later, serum HI titres were determined by using standard HI assays with 0.5% turkey red blood cells. For better data comparison, on the x-axis we list the viruses with which the respective groups of ferrets were subsequently challenged (for results of the challenge experiment, see Fig. 4).

**Supplementary Table 1. Human A(H1N1)pdm09 sera used in this study.**

| Serum ID          | MN titre <sup>c</sup> | Donor age (years) | Date of collection | Screens of wild-type viruses <sup>d</sup> | Screens of virus libraries <sup>e</sup> |
|-------------------|-----------------------|-------------------|--------------------|-------------------------------------------|-----------------------------------------|
| C26 <sup>a</sup>  | 512                   | 11                | November 21, 2009  | +                                         | –                                       |
| C42 <sup>a</sup>  | 512                   | 8                 | November 21, 2009  | +                                         | –                                       |
| C61 <sup>a</sup>  | 512                   | 9                 | November 21, 2009  | +                                         | –                                       |
| C32 <sup>a</sup>  | 256                   | 11                | November 21, 2009  | –                                         | +                                       |
| C53 <sup>a</sup>  | 256                   | 12                | November 21, 2009  | –                                         | +                                       |
| C59 <sup>a</sup>  | 256                   | 9                 | November 21, 2009  | +                                         | +                                       |
| C82 <sup>a</sup>  | 512                   | 10                | January 30, 2010   | +                                         | +                                       |
| C83 <sup>a</sup>  | 512                   | 11                | January 30, 2010   | +                                         | +                                       |
| C84 <sup>a</sup>  | 256                   | 9                 | January 30, 2010   | +                                         | +                                       |
| C86 <sup>a</sup>  | 512                   | 8                 | January 30, 2010   | –                                         | +                                       |
| C87 <sup>a</sup>  | 256                   | 14                | January 30, 2010   | +                                         | +                                       |
| C89 <sup>a</sup>  | 1024                  | 9                 | January 30, 2010   | –                                         | +                                       |
| C91 <sup>a</sup>  | 512                   | 9                 | January 30, 2010   | –                                         | +                                       |
| C96 <sup>a</sup>  | 256                   | 10                | January 30, 2010   | –                                         | +                                       |
| C101 <sup>a</sup> | 256                   | 13                | January 30, 2010   | –                                         | +                                       |
| C103 <sup>a</sup> | 256                   | 8                 | January 30, 2010   | –                                         | +                                       |
| A114 <sup>a</sup> | 256                   | 46                | January 30, 2010   | –                                         | +                                       |
| A163 <sup>b</sup> | 1024                  | 39                | March 25, 2010     | –                                         | +                                       |

<sup>a</sup>Sera from clinical patients infected with an A(H1N1)pdm09 virus, based on a positive result with a rapid diagnosis kit. Sera were selected from a larger panel of sera based on high microneutralization (MN) titres (>256).

<sup>b</sup>Serum from an individual with no known respiratory infection during the 2009–2010 season who was vaccinated in 2009.

<sup>c</sup>Microneutralization (MN) titres were determined using standard MN assays<sup>2,3</sup>. Briefly, 100 TCID<sub>50</sub> of A/Osaka/364/2009 (H1N1) (isolated August, 2009) were incubated with 2-fold serial dilutions of human sera treated with receptor-destroying enzyme (RDE; Denka Seiken Co., Ltd., Tokyo, Japan) for 30 min at 35°C. The mixtures were then added to confluent MDCK cells in 96-well plates to determine the neutralizing activity.

<sup>d</sup>Sera used in antigenic screens of wild-type viruses (see Supplementary Table 2).

<sup>e</sup>Sera used in antigenic screens of virus libraries (see Supplementary Tables 5, 10, and 11).

**Supplementary Table 2. HA mutations identified in antigenic escape mutants selected from clinical A(H1N1)pdm09 isolates with human convalescent sera<sup>a</sup>.**

| Serum ID | HA mutation(s) found in plaque-purified viruses (number of clones with mutations/number of clones examined) using: |                                            |
|----------|--------------------------------------------------------------------------------------------------------------------|--------------------------------------------|
|          | A/Norway/3206-3/2009                                                                                               | A/Yokohama/UT-K1205T/2009                  |
| C26      | ND (0/12 clones) <sup>b</sup>                                                                                      | - <sup>c</sup>                             |
| C42      | K153E+N239K (12/12 clones)                                                                                         | -                                          |
| C61      | K153E+N239K (12/12 clones)                                                                                         | -                                          |
| C59      | K153E+N239K (12/12 clones)                                                                                         | D127E (12/12 clones)                       |
| C82      | ND (0/12 clones)                                                                                                   | D127E (10/12 clones)                       |
| C83      | K153E+N239K (10/12 clones)                                                                                         | D127E (6/12 clones)                        |
| C84      | ND (0/12 clones)                                                                                                   | ND (0/12 clones)                           |
| C87      | K153E+N239K (6/12 clones)                                                                                          | D127E (4/12 clones)<br>K163E (8/12 clones) |

<sup>a</sup>4.0×10<sup>6</sup> PFU of virus were mixed with each of the convalescent human sera and then used to infect MDCK cells. Virus-containing culture supernatants were collected from cells incubated with the highest concentration of antiserum at which a cytopathic effect was observed. Viruses were plaque-purified in MDCK cells. The HA genes of 12 plaque-purified viruses per group were sequenced.

<sup>b</sup>ND, not detected, i.e., no mutations in HA were found.

<sup>c</sup>-, not tested.

**Supplementary Table 3. Antigenic characterization of escape mutants from A(H1N1)pdm09 viruses by HI assay<sup>a</sup>.**

| Virus                           | HI titre with antisera raised against: |                    |             |
|---------------------------------|----------------------------------------|--------------------|-------------|
|                                 | WT Nr3206                              | Nr3206-K153E+N239K | WT Yk1205   |
| WT Nr3206 <sup>b</sup>          | <b>1280<sup>g</sup></b>                | 320                | -           |
| Nr3206-K153E+N239K <sup>c</sup> | 160                                    | <b>320/640</b>     | -           |
| WT Yk1205 <sup>d</sup>          | - <sup>h</sup>                         | -                  | <b>1280</b> |
| Yk1205-D127E <sup>e</sup>       | -                                      | -                  | 320/640     |
| Yk1205-K163E <sup>f</sup>       | -                                      | -                  | 640         |

<sup>a</sup>HI titres were determined by standard HI assays with 0.5% turkey red blood cells, the amount of virus equivalent to 8 haemagglutination units, and the indicated ferret antiserum.

<sup>b</sup>WT Nr3206, wild-type A/Norway/3206-3/2009.

<sup>c</sup>Nr3206-K153E+N239K, A/Norway/3206-3/2909 possessing K153E and N239K mutations.

<sup>d</sup>WT Yk1205, wild-type A/Yokohama/UT-K1205T/2009.

<sup>e</sup>Yk1205-D127E, A/Yokohama/UT-K1205T/2009 possessing a D127E mutation.

<sup>f</sup>Yk1205-K163E, A/Yokohama/UT-K1205T/2009 possessing a K163E mutation.

<sup>g</sup>HI titres to homologous viruses are indicated in boldface.

<sup>h</sup>-, not tested.



**Supplementary Table 4. Diversity of a mutant A/Norway/3858/2009 HA cDNA plasmid library<sup>a</sup>.**

|                                                  | Clone number (%) |
|--------------------------------------------------|------------------|
| Total clones sequenced                           | 24               |
| Wild-type clones                                 | 2 (8%)           |
| Non-functional mutant clones <sup>b</sup>        | 6 (25%)          |
| 1 amino acid change                              | 5 (31%)          |
| 2 amino acid changes                             | 6 (38%)          |
| 3 amino acid changes                             | 3 (19%)          |
| 4 amino acid changes                             | 1 (6%)           |
| 5 amino acid changes                             | 1 (6%)           |
| Functional mutant clones                         |                  |
| Total number of clones with amino acid change(s) | 16 (67%)         |

<sup>a</sup>Random mutations were introduced by error-prone PCR into the globular head region (amino acid positions 54–253) of A/Norway/3858/2009 HA. Twenty-four cDNA clones were sequenced to evaluate the diversity of the library.

<sup>b</sup>"Non-functional" clones acquired a stop codon or a nucleotide deletion so that functional HA protein should no longer be expressed.

**Supplementary Table 6. Libraries possessing random mutations at one, two, or four amino acid positions of A/Norway/3858/2009 HA<sup>a</sup>.**

| Mutation target (HA amino acid position) | <i>E. coli</i> transformation efficiency (CFU <sup>b</sup> ) | Transfectant virus titre (PFU/ml) | Stock virus titre (PFU/ml) |
|------------------------------------------|--------------------------------------------------------------|-----------------------------------|----------------------------|
| 125                                      | $2.7 \times 10^6$                                            | $1.1 \times 10^7$                 | $2.0 \times 10^8$          |
| 127                                      | $2.9 \times 10^5$                                            | $5.0 \times 10^4$                 | $1.4 \times 10^8$          |
| 129                                      | $7.9 \times 10^5$                                            | $9.0 \times 10^6$                 | $5.0 \times 10^7$          |
| 141                                      | $4.0 \times 10^5$                                            | $1.0 \times 10^6$                 | $1.3 \times 10^8$          |
| 142                                      | $1.5 \times 10^5$                                            | $4.4 \times 10^6$                 | $7.0 \times 10^7$          |
| 152                                      | $2.6 \times 10^6$                                            | $2.5 \times 10^5$                 | $1.1 \times 10^8$          |
| 153                                      | $8.8 \times 10^5$                                            | $3.3 \times 10^7$                 | $5.5 \times 10^7$          |
| 154                                      | $3.4 \times 10^5$                                            | $7.0 \times 10^7$                 | $1.0 \times 10^8$          |
| 155                                      | $1.4 \times 10^6$                                            | $1.2 \times 10^7$                 | $1.8 \times 10^8$          |
| 156                                      | $9.3 \times 10^5$                                            | $1.1 \times 10^7$                 | $1.5 \times 10^8$          |
| 163                                      | $1.9 \times 10^5$                                            | $1.3 \times 10^7$                 | $3.0 \times 10^7$          |
| 183                                      | $6.8 \times 10^4$                                            | $5.1 \times 10^5$                 | $6.0 \times 10^7$          |
| 186                                      | $7.4 \times 10^5$                                            | $1.7 \times 10^6$                 | $1.1 \times 10^8$          |
| 187                                      | $3.4 \times 10^5$                                            | $3.4 \times 10^4$                 | $2.0 \times 10^8$          |
| 190                                      | $6.2 \times 10^5$                                            | $1.5 \times 10^6$                 | $1.4 \times 10^8$          |
| 153+154                                  | $7.8 \times 10^5$                                            | $5.0 \times 10^6$                 | $9.0 \times 10^7$          |
| 153+155                                  | $7.5 \times 10^5$                                            | $2.1 \times 10^7$                 | $1.2 \times 10^8$          |
| 153+156                                  | $6.6 \times 10^5$                                            | $1.7 \times 10^7$                 | $4.3 \times 10^8$          |
| 154+155                                  | $7.2 \times 10^5$                                            | $2.4 \times 10^7$                 | $2.2 \times 10^8$          |
| 154+156                                  | $5.6 \times 10^5$                                            | $2.7 \times 10^7$                 | $7.5 \times 10^7$          |
| 155+156                                  | $1.1 \times 10^6$                                            | $1.0 \times 10^7$                 | $2.7 \times 10^8$          |
| 153+154+155+156                          | $1.6 \times 10^6$                                            | $6.8 \times 10^7$                 | $3.1 \times 10^8$          |
| D127E 153+154+155+156                    | $7.5 \times 10^6$                                            | $4.9 \times 10^7$                 | $4.3 \times 10^8$          |

<sup>a</sup>Mutagenesis was carried out for the indicated amino acid position(s) by performing PCR with mixtures of primers encoding all possible nucleotide combinations at the targeted codon(s). To represent all possible amino acid combinations at one, two or four amino acid positions, at least 20, 400, or  $1.6 \times 10^5$  variants need to be tested.

<sup>b</sup>Colony-forming units.

**Supplementary Table 7. Antisera used to screen A/Norway/3858/2009 HA libraries possessing random mutations at one, two, or four amino acid positions.**

| Targeted site in HA (amino acid position) | Antisera used for screening (raised in ferrets unless noted otherwise) |
|-------------------------------------------|------------------------------------------------------------------------|
| 125                                       | Nr3858-N125D <sup>a</sup>                                              |
| 127                                       | Nr3858-D127E                                                           |
| 129                                       | Nr3858-N129D                                                           |
| 153                                       | Nr3858-K153E                                                           |
| 154                                       | Nr3858-K154N                                                           |
| 155                                       | Nr3858-G155E                                                           |
| 156                                       | Nr3858-N156D                                                           |
| 163                                       | Nr3858-K163E                                                           |
| 183                                       | Nr3858-S183P                                                           |
| 141                                       | WT Nr3858 <sup>b</sup>                                                 |
| 142                                       | WT Nr3858                                                              |
| 152                                       | WT Nr3858                                                              |
| 186                                       | WT Nr3858                                                              |
| 187                                       | WT Nr3858                                                              |
| 190                                       | WT Nr3858                                                              |
| 153+154                                   | Nr3858-K153E and Nr3858-K154N                                          |
| 153+155                                   | Nr3858-K153E and Nr3858-G155E                                          |
| 153+156                                   | Nr3858-K153E and Nr3858-N156D                                          |
| 154+155                                   | Nr3858-K154N and Nr3858-G155E                                          |
| 154+156                                   | Nr3858-K154N and Nr3858-N156D                                          |
| 155+156                                   | Nr3858-G155E and Nr3858-N156D                                          |
| 153+154+155+156                           | Human antiserum A163                                                   |
| D127E 153+154+155+156                     | Human antiserum A163                                                   |

<sup>a</sup>Nomenclature example: Nr3858-N125D, A/Norway/3858/2009 possessing a N125D mutation.

<sup>b</sup>WT Nr3858, wild-type A/Norway/3858/2009.

**Supplementary Table 12. Diversity of an A/Norway/3858/2009 HA plasmid library possessing random mutations at amino acid positions 153–156<sup>a</sup>.**

| Codon for amino acid at position: |            |            |            |
|-----------------------------------|------------|------------|------------|
| 153                               | 154        | 155        | 156        |
| <b>AAA<sup>b</sup></b>            | <b>AAA</b> | <b>GGA</b> | <b>AAT</b> |
| GCT                               | ATG        | AAC        | CTG        |
| AAC                               | TAG*       | GAT        | TGC        |
| CGA                               | TTT        | GGA        | AGA        |
| ACA                               | GGG        | AAA        | AGT        |
| GGT                               | TCC        | ATC        | AGG        |
| TTC                               | TGT        | TTT        | AGG        |
| TCC                               | TCC        | TCC        | CTA        |
| TGT                               | GCT        | GTA        | GAC        |
| AAA                               | CAC        | TCG        | AAT        |
| TGT                               | CAT        | CGT        | TCC        |
| TGA* <sup>c</sup>                 | AAA        | TGA*       | GAT        |
| GGT                               | AGG        | GTG        | ATA        |
| TCC                               | GGT        | ATT        | GAA        |
| TTG                               | CCT        | TTT        | TTT        |
| AAA                               | ATT        | ATT        | CGC        |
| ACG                               | ATC        | TCG        | GCA        |
| TCT                               | TCG        | GGG        | AGT        |
| GTT                               | TGA*       | TGT        | GAC        |
| TCA                               | TCG        | GAT        | TGT        |
| GGT                               | TCA        | TAA*       | GAC        |
| GCT                               | AGG        | CAA        | TTC        |
| TTT                               | GCA        | AGA        | TAA*       |
| TTC                               | GTT        | TAC        | GGG        |
| CCC                               | TGG        | GCG        | GCG        |
| AAG                               | GAC        | TAA*       | GAG        |
| TTT                               | GTA        | CGA        | ACC        |
| CTG                               | GGA        | TTT        | TGA*       |
| ACG                               | GGT        | CCA        | AAA        |
| AAC                               | AGC        | GTA        | CTA        |
| TTT                               | GAC        | CCT        | ACT        |
| GGC                               | TCC        | TGG        | TCG        |
| AAA                               | AGA        | GAG        | TCG        |
| AGC                               | AAA        | GTG        | TGC        |
| GAA                               | AGG        | CCA        | GCC        |

<sup>a</sup>Mutagenesis targeting amino acid positions 153–156 of A/Norway/3858/2009 HA was carried out as described in the Methods section. Thirty-four cDNA clones were sequenced to confirm the diversity of the library.

<sup>b</sup>Nucleotide sequences of wild-type A/Norway/3858/2009 HA gene are shown in boldface.

<sup>c</sup>Asterisk (\*), stop codon.

**Supplementary Table 13. Diversity of an A/Norway/3858/2009 HA plasmid library possessing the D127E mutation and random mutations at amino acid positions 153–156<sup>a</sup>.**

| Codon for amino acid at position: |            |            |            |
|-----------------------------------|------------|------------|------------|
| 153                               | 154        | 155        | 156        |
| <b>AAA</b> <sup>b</sup>           | <b>AAA</b> | <b>GGA</b> | <b>AAT</b> |
| ACA                               | AGC        | AGC        | TTC        |
| GGA                               | CTG        | GAT        | ATC        |
| AGG                               | GTC        | TAG*       | GTA        |
| ATT                               | ATA        | GGT        | TTA        |
| CAC                               | ACG        | TTA        | CAG        |
| TGA* <sup>c</sup>                 | CTA        | GGC        | CCG        |
| AAA                               | GGT        | TCG        | CCC        |
| GGT                               | AGT        | GAG        | GGT        |
| AAA                               | AAA        | GGA        | AAT        |
| GTA                               | GAA        | TGA*       | TGC        |
| GGA                               | ACC        | AAG        | TTT        |
| AAT                               | GTG        | TGT        | GGC        |
| GCT                               | TGC        | TTT        | CCA        |
| GGT                               | CAC        | AGT        | AGT        |
| TTG                               | CCA        | GTC        | AGC        |
| TAA*                              | CGG        | ATG        | AGC        |
| TTC                               | TTA        | GGG        | TGT        |
| GAA                               | GGG        | CTG        | CAT        |
| TTC                               | TAT        | CAG        | TCC        |
| CAG                               | GAC        | AAT        | GCT        |
| AGT                               | GCG        | ACC        | GGA        |
| TCG                               | TCA        | ATA        | ACC        |
| GTA                               | TCC        | TTG        | GAG        |
| TCA                               | GTT        | ATC        | CGG        |
| CAA                               | CGT        | CTG        | CGC        |
| GTG                               | TGT        | TCG        | TGG        |
| TGG                               | TCT        | GAA        | AAA        |

<sup>a</sup>Mutagenesis targeting amino acid positions 153–156 of A/Norway/3858/2009 HA possessing the D127E mutation was carried out as described in the Methods section. Twenty-seven cDNA clones were sequenced to confirm the diversity of the library.

<sup>b</sup>Nucleotide sequences of wild-type A/Norway/3858/2009 HA gene are shown in boldface.

<sup>c</sup>Asterisk (\*), stop codon.

**Supplementary Table 14. Selection of antigenic escape mutants in mice.**

| Mouse ID | Mouse strain | HI titre of mouse serum <sup>a</sup> | Challenge virus                      | Virus titre in lungs <sup>c</sup> (PFU/g) |
|----------|--------------|--------------------------------------|--------------------------------------|-------------------------------------------|
| 1        | BALB/c       | 80                                   | WT CA04 <sup>b</sup>                 | <50                                       |
| 2        |              | 80                                   |                                      | <50                                       |
| 3        |              | <10                                  |                                      | $7.39 \times 10^6$                        |
| 4        |              | <10                                  | Nr3858 with 5 mutations <sup>d</sup> | $1.18 \times 10^7$                        |
| 5        |              | 80                                   |                                      | $2.42 \times 10^2$                        |
| 6        |              | <10                                  |                                      | $8.57 \times 10^6$                        |
| 7        | C57BL6/J     | 40                                   | WT CA04                              | <50                                       |
| 8        |              | 80/160                               |                                      | <50                                       |
| 9        |              | 80                                   |                                      | <50                                       |
| 10       |              | 80                                   | Nr3858 with 5 mutations              | $1.05 \times 10^3$                        |
| 11       |              | 80/160                               |                                      | <50                                       |
| 12       |              | 80/160                               |                                      | <50                                       |

<sup>a</sup>HI titres were determined by standard HI assays with 0.5% turkey red blood cells, the amount of wild-type A/California/04/2009 virus equivalent to 8 haemagglutination units, and the sera collected from the indicated mice four weeks post-infection.

<sup>b</sup>WT CA04, wild-type A/California/04/2009 virus.

<sup>c</sup>The virus detection limit was 50 PFU/g.

<sup>d</sup>Nr3858 with 5 mutations, A/Norway/3858/2009 possessing the prefixed D127E mutation and random mutations at positions 153–156 of HA.

**Supplementary Table 16. Virus strains and HA mutants used to raise ferret antisera for antigenic cartography.**

| Virus type                                       | Virus strain or HA mutant                     |
|--------------------------------------------------|-----------------------------------------------|
| A(H1N1)pdm09                                     | A/California/04/2009                          |
|                                                  | A/Norway/3568/2009                            |
|                                                  | A/Norway/3206-3/2009                          |
|                                                  | A/Norway/3206-3/2009-K153E+N239K <sup>a</sup> |
|                                                  | A/Yokohama/UT-K1205T/2009                     |
|                                                  | A/Yokohama/UT-K1205T/2009-K163E               |
|                                                  | A/Norway/3858/2009                            |
|                                                  | A/Norway/3858/2009-N125D                      |
|                                                  | A/Norway/3858/2009-D127E                      |
|                                                  | A/Norway/3858/2009-N129D                      |
|                                                  | A/Norway/3858/2009-K153E                      |
|                                                  | A/Norway/3858/2009-K154N                      |
|                                                  | A/Norway/3858/2009-G155E                      |
|                                                  | A/Norway/3858/2009-N156D                      |
|                                                  | A/Norway/3858/2009-K163E                      |
|                                                  | A/Norway/3858/2009-S183P                      |
|                                                  | A/Norway/3858/2009-K154G+N156V                |
| A/Norway/3858/2009-K153S+K154L+G155R+N156S       |                                               |
| A/Norway/3858/2009-D127E+K153A+K154L+G155R+N156G |                                               |
| Seasonal human and swine H1N1 viruses            | A/swine/Iowa/15/1930                          |
|                                                  | A/New Jersey/8/1976                           |
|                                                  | A/Wisconsin/10/1998                           |
|                                                  | A/Wisconsin/87/2005                           |
|                                                  | A/Ohio/01/2007                                |
|                                                  | A/Texas/14/2008                               |

<sup>a</sup>A/Norway/3206-3/2009-K153E+N239K, A/Norway/3206-3/2009 possessing K153E and N239K mutations.

**Supplementary Table 17. A(H1N1)pdm09 HA mutants used to raise additional ferret antisera to potentially improve mutant virus resolution by antigenic cartography.**

| A(H1N1)pdm09 HA mutant                           | Property                                            |
|--------------------------------------------------|-----------------------------------------------------|
| A/Norway/3858/2009-N125G                         | Antigenically close to wild-type viruses            |
| A/Norway/3858/2009-D127S                         | Amino acid close to 153/156 loop in structure of HA |
| A/Norway/3858/2009-K153H+N156H                   | All large aromatic amino acids                      |
| A/Norway/3858/2009-K154N+S183P                   | Antigenically in intermediate cluster               |
| A/Norway/3858/2009-D127E+K153S+N156T             | All negative or polar amino acids                   |
| A/Norway/3858/2009-K153A+K154A+N156G             | All small, hydrophobic amino acids                  |
| A/Norway/3858/2009-K153Q+K154Q+G155R             | All positive amino acids                            |
| A/Norway/3858/2009-K153S+K154G+G155Y+N156G*      | Virus most distant from others antigenically        |
| A/Norway/3858/2009-D127E+K153R+K154G+G155H+N156S | Mixed size and charge of amino acids                |
| A/Norway/3858/2009-D127E+K153R+K154R+G155E+N156H | All large amino acids                               |

\*The position of this antiserum in the antigenic map was not well-coordinated and the antiserum was excluded from the analysis.



**Supplementary Table 18. Virus strains and HA mutants used to challenge immunized mice<sup>a</sup>.**

| Virus ID | Virus strain or HA mutant                         | Method by which the HA mutant was selected                   |
|----------|---------------------------------------------------|--------------------------------------------------------------|
| CA04     | A/California/04/2009                              | NA <sup>b</sup>                                              |
| Nr3858   | A/Norway/3858/2009                                | NA                                                           |
| C1       | Nr3858-D127E+K153S+K154L+G155K+N156G <sup>a</sup> | <i>In vitro</i> <sup>c</sup> and <i>In vivo</i> <sup>d</sup> |
| 3-2/3    | Nr3858-D127E+K153A+K154L+G155R+N156G              | <i>In vivo</i>                                               |
| C20      | Nr3858-D127E+K153A+K154L+G155N+N156K              | <i>In vitro</i> and <i>In vivo</i>                           |
| C34      | Nr3858-D127E+K153Q+K154N+G155S+N156G              | <i>In vitro</i> and <i>In vivo</i>                           |
| C36      | Nr3858-D127E+K153S+K154L+G155R+N156G              | <i>In vitro</i> and <i>In vivo</i>                           |
| C47      | Nr3858-D127E+K153G+K154I+G155N+N156R              | <i>In vitro</i>                                              |
| C53      | Nr3858-D127E+K153R+K154L+G155S+N156G              | <i>In vitro</i>                                              |
| 16-1/3   | Nr3858-D127E+K153R+K154R+G155E+N156H              | <i>In vivo</i>                                               |
| 16-1/4   | Nr3858-D127E+K153A+K154L+G155Q+N156K              | <i>In vivo</i>                                               |
| 16-1/8   | Nr3858-D127E+K153A+G155H+N156G                    | <i>In vivo</i>                                               |
| 16-1/11  | Nr3858-D127E+K153G+K154L+G155R+N156G              | <i>In vivo</i>                                               |
| 16-1/27  | Nr3858-D127E+K153A+K154N+G155R+N156G              | <i>In vivo</i>                                               |
| 029/13   | Nr3858-K153S+K154G+G155Y+N156G                    | <i>In vitro</i>                                              |

<sup>a</sup>Nr3858-D127E+K153S+K154L+G155K+N156G, A/Norway/3858/2009 possessing the D127E, K153S, K154L, G155K, and N156G mutations in HA.

<sup>b</sup>NA, not applicable.

<sup>c</sup>*In vitro* selection with human antiserum A163.

<sup>d</sup>*In vivo* selection in immunized mice.

**Supplementary Table 19. Reassortant viruses used to challenge immunized mice<sup>a</sup>.**

| Virus ID  | HA mutation compared to A/Norway/3858/2009 | Origin of HA and NA genes <sup>b</sup>       |
|-----------|--------------------------------------------|----------------------------------------------|
| 153       | K153E                                      | A/New York/4557/2009                         |
| 154       | K154E                                      | A/New York/4459/2009                         |
| 155-A     | G155E                                      | A/Bangkok/INS425/2010                        |
| 155-B     | G155E                                      | A/Jiangsu/1/2009                             |
| 156-A     | N156S                                      | A/Qingdao/1610/2009 <sup>c</sup>             |
| 156-B     | N156T                                      | A/Wisconsin/629/D00223/2009                  |
| 153+155   | K153E+G155E                                | A/Miyazaki/40/2011 <sup>d,e</sup>            |
| 154+155   | K154Q+G155E                                | A/Okinawa/41/2010 <sup>d,e</sup>             |
| 155+156-A | G155E+N156S                                | A/Cameroon/LEID/01/11/1398/2010 <sup>e</sup> |
| 155+156-B | G155E+N156K                                | A/Townsville/56/2010                         |

<sup>a</sup>HA and NA genes of reassortant viruses were derived from A(H1N1)pdm09 field strains, while the remaining six genes were from A/Norway/3568/2009.

<sup>b</sup>A(H1N1)pdm09 field strains were identified from the influenza viral genome sequence database Global Initiative on Sharing All Influenza Data (GISAID) or from the National Center for Biotechnology Information .

<sup>c</sup>Since the A/Qingdao/1610/2009 NA gene sequence is not publicly available, we used the NA gene of A/Norway/3568/2009 virus.

<sup>d</sup>The HA2 portions of the A/Miyazaki/40/2011 and A/Okinawa/41/2010 HA gene segments are not publicly available; we, therefore, constructed chimera between the A/Miyazaki/40/2011 and A/Okinawa/41/2010 HA1 sequences and the A/Norway/3568/2009 HA2 sequence.

<sup>e</sup>Mixed mutations are present in the targeted positions of the original HA sequences [153(K/E)+155(G/E) for A/Miyazaki/40/2011; 154(K/Q)+155(G/E) for A/Okinawa/41/2010; 155(G/E)+156S for A/Cameroon/LEID/01/11/1398/2010]. Based on this information, the K153E+G155E mutations were introduced into virus 153+155, K154Q+G155E mutations were introduced into virus 154+155, and G155E+N156S mutations were introduced into virus 155+156-A.

**Supplementary Table 22. Human sera used in A/Texas/50/2012 (H3N2) escape mutant selection**

| Serum ID <sup>a</sup> | Group No. <sup>b</sup> | HI titre <sup>c</sup> | Donor age (years) | Date of collection |
|-----------------------|------------------------|-----------------------|-------------------|--------------------|
| LS 2361308A           | 2                      | 40                    | 31                | December 1, 2013   |
| LS 2361081A           | 2                      | 40                    | 33                | December 4, 2013   |
| LS 2361252A           | 3                      | 80                    | 46                | December 10, 2013  |
| LS 5543568A           | 2                      | 160                   | 37                | December 30, 2013  |
| LS 2362317A           | 3                      | 160                   | 53                | January 21, 2014   |
| LS 8812408A           | 1                      | 160                   | 25                | January 23, 2014   |
| LS 8812407A           | 1                      | 160                   | 29                | January 23, 2014   |
| LS 8812404A           | 2                      | 160                   | 30                | January 23, 2014   |
| LS 8812400A           | 1                      | 80                    | 23                | January 23, 2014   |
| LS 5543871A           | 3                      | 80                    | 59                | January 23, 2014   |

<sup>a</sup>Sera from anonymized healthy donors (Lampire Biological Products, Pipersville, PA).

<sup>b</sup>For some antigenic screens, human sera were combined based on the donor's age: Group 1 (G1): Age 23-29; Group 2 (G2): Age 30-37; Group 3 (G3): Age 46-59.

<sup>c</sup>Haemagglutination inhibition (HI) titres were determined using standard HI assays with 0.75% guinea pig red blood cells and the amount of A/Texas/50/2012 (H3N2) virus equivalent to 8 haemagglutinating units.

## References

- 1 Xu, R. *et al.* Structural basis of preexisting immunity to the 2009 H1N1 pandemic influenza virus. *Science* **328**, 357-360 (2010).
- 2 Kobasa, D. *et al.* Enhanced virulence of influenza A viruses with the haemagglutinin of the 1918 pandemic virus. *Nature* **431**, 703-707 (2004).
- 3 Itoh, Y. *et al.* In vitro and in vivo characterization of new swine-origin H1N1 influenza viruses. *Nature* **460**, 1021-1025 (2009).
